# Supplementary material
Source: Elsevier journal article supplement (https://www.sciencedirect.com/science/article/pii/S1888989120300276)
Supplement: mmc1 [file S1888989120300276:mmc1.docx]

**ANNEX**

**ESCALA DE VALORACIÓN DE ALUCINACIONES AUDITIVAS VOCALES (AVHRS)**

(Jenner y Van de Willige, 2002)

(Traducción al castellano de Lorente-Rovira, Modinos y Bartels-Velthuis)

La AVHRS es una entrevista estructurada que pretende obtener información detallada acerca de las alucinaciones auditivas vocales del paciente, ocurridas en el último mes.

Con fines clínicos y/o de investigación permite evaluar uno o más intervalos temporales, por ejemplo: la última semana, el último año, a lo largo de toda la vida, etc.

Abajo, se especifica uno periodo temporal, el último mes (mes), y además se da la oportunidad de evaluar otro periodo temporal.

**• Marque la puntuación más alta que haya tenido lugar en el periodo evaluado, pero en caso de duda entre dos puntuaciones seleccione la más baja.**

**• Puntúe ‘8’ si la respuesta sigue siendo poco clara, incluso después de una exploración minuciosa.**

**• Puntúe ‘9’ en caso de que la pregunta no haya sido realizada.**

• Las preguntas obligatorias **(Ob)** aparecen en **negrita**.

• Las preguntas opcionales *(Op)* aparecen en *cursiva*.

**Nombre:** ______________________________ **Sexo: M / F**

**Fecha de nacimiento:** ______________________________

**Diagnóstico:** ______________________________

**Fecha de evaluación:** _____________________ **Evaluador:** ___________________

**Duración del periodo en que se escuchan voces:** ______________ **meses / años**

**Alucinaciones en otras modalidades:** (mes) **visual / olfativa / gustativa / táctil**

(……...) **visual / olfativa / gustativa / táctil**

**1a. Número de voces**

**Ob: ¿Cuantas voces ha escuchado en el ultimo mes, se trataba siempre de una voz o existían más voces?**

**Especificar el número de voces** (último mes:…………… / otro periodo:.…….…… )

*Nota: Si el paciente escucha sólo una voz, puede saltarse la próxima pregunta, pero marque con un 1 la pregunta 1b.*

*Recuerde preguntar por ‘la voz’ en las siguientes preguntas en lugar de ‘las voces’.*

**1b. Por separado o simultáneamente**

**En caso de múltiples voces, preguntar:**

**Ob: ¿Estas voces hablan por separado (una por una) o juntas al mismo tiempo?**

| mes |  |  |
| --- | --- | --- |
| **0** | **0** | sin voces en el periodo de tiempo especificado, o menos de una vez al mes |
| **1** | **1** | siempre **una** voz |
| **2** | **2** | varias voces, que siempre hablan **por separado**; número de voces: … |
| **3** | **3** | varias voces, que (ocasionalmente) hablan **simultáneamente**; número de voces: … |
| **8** | **8** | poco claro, incluso tras evaluación minuciosa |
| **9** | **9** | pregunta no realizada |

**2. Voces hipnagogicas e/o hipnopompicas**

**Ob: ¿A qué hora del día escucha la voz/las voces?**

*Nota: preguntar todas las opciones de respuesta.*

| mes |  |  |
| --- | --- | --- |
| **1** | **1** | sólo oigo voces cuando me estoy **quedando dormido** |
| **2** | **2** | sólo oigo voces cuando me estoy **despertando** |
| **3** | **3** | sólo oigo voces cuando me estoy **quedando dormido** y cuando **me estoy despertando**, pero no en otros momentos |
| **4** | **4** | las voces pueden ocurrir **a cualquier hora**; cuando me estoy quedando dormido, cuando me estoy despertando y en otros momentos |
| **8** | **8** | poco claro, incluso tras exploración minuciosa |
| **9** | **9** | pregunta no realizada |

**3. Frecuencia**

**Ob: ¿Con qué frecuencia escucha voces?**

*Nota: En caso de una respuesta poco clara presentar todas las opciones de respuesta*

| mes |  |  |
| --- | --- | --- |
| 0 | 0 | sin voces en el periodo de tiempo especificado, o menos de una vez al mes (especificar frecuencia: ..….) |
| 1 | 1 | al menos **una vez a la semana** |
| 2 | 2 | al menos **una vez al día** |
| 3 | 3 | al menos **una vez cada hora** |
| 4 | 4 | **continuamente**, o con interrupciones ocasionales de pocos minutos *) |
| 8 | 8 | poco claro, incluso tras exploración minuciosa |
| 9 | 9 | pregunta no realizada |

** Puntuar 4 en esta pregunta, implica también una puntuación de 4 en la próxima pregunta. En este caso la pregunta 4 puede saltarse. (Nota: marcar 4 en ‘Duración’.)*

**4. Duración**

**Ob: Cuando usted escucha voces, ¿durante cuanto tiempo persisten?**

*Nota: En caso de una respuesta poco clara presentar todas las opciones de respuesta.*

| **mes** |  |  |
| --- | --- | --- |
| **0** | **0** | sin voces en el periodo de tiempo especificado, o menos de una vez al mes |
| **1** | **1** | sólo **unos pocos segundos**, una experiencia transitoria |
| **2** | **2** | **unos pocos minutos** |
| **3** | **3** | al menos **una hora** |
| **4** | **4** | **más horas de forma consecutiva** o **continua** |
| **8** | **8** | poco claro, incluso tras exploración minuciosa |
| **9** | **9** | pregunta no realizada |

**5. Localización**

**Ob: Cuando usted escucha voces, ¿de dónde parece que viene el sonido?**

*Op: ¿De dentro o de fuera de su cabeza?*

| **mes** |  |  |
| --- | --- | --- |
| **0** | **0** | sin voces en el periodo de tiempo especificado, o menos de una vez al mes |
| **1** | **1** | sólo **dentro** de la cabeza |
| **2** | **2** | tanto **dentro como fuera** de la cabeza |
| **3** | **3** | sólo **fuera** de la cabeza, pero **cerca de los oídos** |
| **4** | **4** | sólo **fuera** de la cabeza**, pero lejos de ésta** |
| **8** | **8** | poco claro, incluso tras exploración minuciosa |
| **9** | **9** | pregunta no realizada |

**6. Volumen**

**Ob: ¿A qué volumen escucha usted sus voces?**

*Nota: En caso de una respuesta poco clara presentar todas las opciones de respuesta.*

| **mes** |  |  |
| --- | --- | --- |
| **0** | **0** | sin voces en el periodo de tiempo especificado, o menos de una vez al mes |
| **1** | **1** | **más silenciosas** que la propia voz del paciente, por ejemplo un susurro |
| **2** | **2** | más o menos **igual** que la propia voz del paciente |
| **3** | **3** | **más fuerte** que la propia voz del paciente |
| **4** | **4** | muy fuerte; **a gritos o voceando** |
| **8** | **8** | poco claro, incluso tras exploración minuciosa |
| **9** | **9** | pregunta no realizada |

**7. Origen de las voces**

**Ob: ¿Qué cree que causa sus voces?**

*Op: ¿Las voces están causadas por algo relacionado con usted (por ejemplo sus propios pensamientos, sus propios sentimientos, o por el estrés o la ansiedad), o las voces están causadas por algo externo a usted (otras personas, espíritus, seres extraterrestres o algo parecido?*

**Si el paciente refiere una causa externa, entonces preguntar:**

**Ob: Me ha contado que las voces podrían estar causadas por ……... ¿En qué medida está seguro de esto?**

| **mes** |  |  |
| --- | --- | --- |
| **0** | **0** | sin voces en el periodo de tiempo especificado, o menos de una vez al mes |
| **1** | **1** | el paciente piensa que las voces están causadas **sólo por factores internos** (asociados con él/ella mismo/a) |
| **2** | **2** | el paciente piensa que las voces están causadas **principalmente por factores internos** (≥ 50%), pero también pueden existir causas externas |
| **3** | **3** | el paciente piensa que las voces están causadas **principalmente por factores externos** (≥ 50%), pero también pueden existir causas internas |
| **4** | **4** | el paciente piensa que las voces están causadas **sólo por factores externos** |
| **8** | **8** | poco claro, incluso tras exploración minuciosa |
| **9** | **9** | pregunta no realizada |

*Nota: Puntuación de la pregunta 7: tomar la media del periodo especificado.*

**8. Contenido negativo**

**Ob: ¿Sus voces dicen cosas desagradables, negativas o molestas? ¿O son en su mayoría neutras ?**

**Ob: ¿Sus voces dicen también cosas positivas?**

**Ob: ¿Con qué frecuencia sus voces dicen cosas negativas y con qué frecuencia dicen cosas positivas (o neutras)?**

*Op: ¿Podría darme algunos ejemplos de lo que dicen sus voces? (Tomar nota de los ejemplos.)*

**…………………………………………………………………………………………………**

**…………………………………………………………………………………………………**

**…………………………………………………………………………………………………**

| **mes** |  |  |
| --- | --- | --- |
| **0** | **0** | las voces **nunca** dicen cosas desagradables, negativas o molestas |
| **1** | **1** | las voces sólo **ocasionalmente** dicen cosas desagradables, negativas o molestas |
| **2** | **2** | **más que ocasionalmente, pero menos de la mitad de las veces** las voces dicen cosas desagradables, negativas o molestas |
| **3** | **3** | **más de la mitad de las veces** las voces dicen cosas desagradables, negativas o molestas |
| **4** | **4** | las voces **siempre** dicen cosas desagradables, negativas o molestas |
| **8** | **8** | poco claro, incluso tras exploración minuciosa |
| **9** | **9** | pregunta no realizada |

*Nota: Si queda claro en la pregunta 8 que las voces no son desagradables, negativas o molestas puntuar 0 en la pregunta 9, y continuar con la pregunta10.*

**9. Gravedad del contenido negativo**

**Ob: Usted me ha dicho que las voces son desagradables, negativas o molestas. ¿Dicen cosas desagradables, negativas o molestas sobre usted o su familia o sólo de otras personas? ¿O sólo dicen cosas molestas como maldecir (palabrotas)?**

**Ob: ¿Las voces le prohíben hacer ciertas cosas, por ejemplo: “No hagas esto o aquello” o “No cuentes o digas esto o aquello”?**

**Ob: ¿Las voces le amenazan, o le dicen que tiene que lastimarse o lastimar a otras personas?**

| **mes** |  |  |
| --- | --- | --- |
| **0** | **0** | las voces **no son desagradables, negativas o molestas** |
| **1** | **1** | las voces son desagradables, negativas o molestas, hasta cierto punto, pero **no desagradables sobre el paciente o su familia** (por ejemplo, las voces maldicen o hacen comentarios acerca de otras personas) |
| **2** | **2** | las voces dicen cosas desagradables, negativas o molestas, sobre el **comportamiento del paciente o de su familia**, pero no sobre el paciente mismo (por ejemplo “Estás actuando como un loco o un estúpido." O "Tu familia no quiere verte más”). |
| **3** | **3** | las voces dicen cosas desagradables, negativas o molestas, sobre **el paciente o su familia** **en si mismos** (por ejemplo., “Eres feo, estás trastornado, loco, …” o “Tus padres están locos …”). |
| **4** | **4** | las voces **amenazan** al paciente y/o le **dan ordenes** (por ejemplo, instrucciones de lastimarse a si mismo o a otros, de ofender o hacer sufrir a su familia o a si mismo) |
| **8** | **8** | poco claro, incluso tras exploración minuciosa |
| **9** | **9** | pregunta no realizada |

**10. Frecuencia del malestar o sufrimiento**

**Ob: ¿Con qué frecuencia sufre a causa de las voces?**

*Nota: En caso de una respuesta poco clara presentar todas las opciones de respuesta.*

*Nota: Puntuar 0 en la pregunta 10, implica una puntuación de 0 en la pregunta 11. En este caso, por favor marcar 0 en la siguiente pregunta.*

| **mes** |  |  |
| --- | --- | --- |
| **0** | **0** | las voces **nunca** causan malestar o sufrimiento |
| **1** | **1** | las voces **a veces** causan malestar o sufrimiento, pero menos del 50% del tiempo |
| **2** | **2** | **la mitad del tiempo** las voces causan malestar o sufrimiento |
| **3** | **3** | **la mayor parte del tiempo** las voces causan malestar o sufrimiento |
| **4** | **4** | las voces **siempre** causan malestar o sufrimiento |
| **8** | **8** | poco claro, incluso tras exploración minuciosa |
| **9** | **9** | pregunta no realizada |

**11. Intensidad del malestar o sufrimiento**

**Ob: Me acaba de decir que sufre a causa de la/s voz/es. ¿Podría decirme en qué medida le afecta esto? ¿En qué medida sufre emocionalmente a causa de ella/s?**

*Nota: En caso de una respuesta poco clara presentar todos los ítems de respuesta.*

| mes |  |  |
| --- | --- | --- |
| 0 | 0 | las voces **no** causan malestar o sufrimiento |
| 1 | 1 | las voces causan **algún** malestar o sufrimiento |
| 2 | 2 | las voces causan un malestar o sufrimiento **serio** |
| 3 | 3 | las voces causan un malestar o sufrimiento **severo**, pero podría ser peor |
| 4 | 4 | las voces causan un malestar o sufrimiento **extremo**, el peor que se podría imaginar |
| 8 | 8 | poco claro, incluso tras exploración minuciosa |
| 9 | 9 | pregunta no realizada |

**12. Interferencia con el funcionamiento cotidiano**

**Ob: ¿Hasta qué punto las voces interfieren con su vida diaria?**

*Op: ¿Sus voces interfieren con las tareas y actividades diarias como trabajar, estudiar, hacer la limpieza, la compra u otras actividades?,*

*shopping or other activities?*

*Oq: Do you get into trouble with your family or friends because of the voices? Can you give me an*

*example?*

*Oq: Have the voices kept you from proper self-care, like washing or getting properly dressed, etc.*

| **mes** |  |  |
| --- | --- | --- |
| **0** | **0** | **sin interferencia** en el funcionamiento diario  El paciente es capaz de vivir independiente, sin problemas en sus actividades diarias.  El paciente es capaz de mantener relaciones sociales y familiares (si los hubiera). |
| **1** | **1** | **interferencia limitada** en el funcionamiento diario  Las voces pueden afectar a la concentración, pero puede mantener las actividades diarias y las relaciones sociales y familiares. El paciente pude vivir sin apoyo adicional. |
| **2** | **2** | **interferencia moderada** en el funcionamiento diario  Algunas restricciones en las actividades diarias y/o en las relaciones sociales y familiares.  El paciente es capaz de vivir en el hogar, pero necesita apoyo y ayuda con las actividades diarias o un empleo protegido. |
| **3** | **3** | **interferencia severa** en el funcionamiento diario  El paciente está frecuentemente de baja por enfermedad y/o tiene empleo protegido. Requiere a menudo tratamiento de día o ambulatorio a menudo. El paciente mantiene algunas de las actividades cotidianas, el cuidado personal y las relaciones sociales. |
| **4** | **4** | **interferencia completa** en el funcionamiento diario  Debido a las voces la hospitalización es necesaria. Incapacidad para mantener las actividades cotidianas y las relaciones. El cuidado personal está muy afectado. |
| **8** | **8** | poco claro, incluso tras exploración minuciosa |
| **9** | **9** | pregunta no realizada |

**13. Control**

**Ob: ¿Siente que puede manejar o controlar sus voces?**

*Op: Por ejemplo, ¿puede provocarlas o hacerlas desaparecer? ¿Le escuchan y hacen lo que usted quiere?*

| **mes** |  |  |
| --- | --- | --- |
| **0** | **0** | el paciente tiene **total control** sobre las voces;  puede provocarlas y hacerlas desaparecer cuando lo desea. |
| **1** | **1** | el paciente tiene **cierto control** sobre las voces **la mayor parte del tiempo** |
| **2** | **2** | el paciente tiene **cierto control** sobre las voces **la mitad del tiempo** |
| **3** | **3** | el paciente tiene **cierto control** sobre las voces **sólo ocasionalmente** |
| **4** | **4** | el paciente **no tiene ningún control** sobre las voces;  no puede provocarlas ni hacerlas desaparecer. |
| **8** | **8** | poco claro, incluso tras exploración minuciosa |
| **9** | **9** | pregunta no realizada |

**14. Ansiedad**

**Ob: ¿Las voces te provocan ansiedad?**

*Nota: En caso de una respuesta poco clara presentar todas las posibles respuestas.*

| **Mes** |  |  |
| --- | --- | --- |
| **0** | **0** | las voces **nunca** causan ansiedad |
| **1** | **1** | las voces **casi nunca** causan ansiedad |
| **2** | **2** | las voces **algunas veces** causan ansiedad |
| **3** | **3** | las voces causan ansiedad **la mayor parte del tiempo** |
| **4** | **4** | **en ocasiones** el paciente entra **completamente en pánico** debido a las voces |
| **8** | **8** | poco claro, incluso tras exploración minuciosa |
| **9** | **9** | pregunta no realizada |

**15. Interferencia con el pensamiento**

**Ob: ¿Las voces interfieren con tus pensamientos?**

*Nota: En caso de una respuesta poco clara presentar todas las posibles respuestas.*

| **Mes** |  |  |
| --- | --- | --- |
| **0** | **0** | no, las voces **nunca** interfieren con el pensamiento |
| **1** | **1** | no, las voces **casi nunca** interfieren con el pensamiento |
| **2** | **2** | sí, las voces **algunas veces** interfieren con el pensamiento |
| **3** | **3** | sí, **la mayor parte del tiempo** interfieren con el pensamiento |
| **4** | **4** | sí, **siempre** interfieren con el pensamiento |
| **8** | **8** | poco claro, incluso tras exploración minuciosa |
| **9** | **9** | pregunta no realizada |

**16. Voces en 1ª, 2ª o 3ª persona**

*Explicación:*

*Las voces que representan los propios pensamientos del paciente en voz alta se denominan voces en 1ª persona.*

*Las voces que hablan al paciente o le dan instrucciones se denominan voces en 2ª persona.*

*Las voces que hablan entre sí sobre el paciente se denominan voces en 3ª persona.*

*Pueden estar presentes los tres tipos de voces, así que evalúe todas las que procedan.*

**Ob: ¿Las voces dicen en voz alta lo que está pensando? Por ejemplo, “Oh, soy estúpido”. (Si responde afirmativamente, puntuar 1ª persona)**

**Ob: ¿Las voces le hablan a usted? Por ejemplo, “Eres estúpido” (Si responde afirmativamente, puntuar 2ª persona)**

**Ob: ¿Las voces hablan entre ellas sobre usted? Por ejemplo, “Mira, hace las mismas cosas estúpidas otra vez”. (Si responde afirmativamente, puntuar 3ª persona)**

| mes |  |  |
| --- | --- | --- |
| 0 | 0 | sin voces en el periodo de tiempo especificado, o menos de una vez al mes |
|  |  |  |
| 0 | 0 | no existen voces en **1ª persona** |
| 1 | 1 | sí, existen voces en **1ª persona**; número: … |
| 8 | 8 | poco claro, incluso tras exploración minuciosa |
| 9 | 9 | pregunta no realizada |
|  |  |  |
| 0 | 0 | no existen voces en **2ª persona** |
| 1 | 1 | sí, existen voces en **2ª persona**; número: … |
| 8 | 8 | poco claro, incluso tras exploración minuciosa |
| 9 | 9 | pregunta no realizada |
|  |  |  |
| 0 | 0 | no existen voces en **3ª persona** |
| 1 | 1 | sí, existen voces en **3ª persona**; número: … |
| 8 | 8 | poco claro, incluso tras exploración minuciosa |
| 9 | 9 | pregunta no realizada |

Identificación del paciente: ……………………………………. Fecha: ………………………

Evaluador: …………………………………….

……

mes

| **1a** | Número de voces | |  |  |
| --- | --- | --- | --- | --- |
| **1b** | Por separado o simultáneamente | |  |  |
| **2** | Voces hipnagógicas e/o hipnopómpicas | |  |  |
| **3** | Frecuencia | |  |  |
| **4** | Duración | |  |  |
| **5** | Localización | |  |  |
| **6** | Volumen | |  |  |
| **7** | Origen de las voces | |  |  |
| **8** | Contenido negativo | |  |  |
| **9** | Gravedad del contenido negativo | |  |  |
| **10** | Frecuencia del malestar o sufrimiento | |  |  |
| **11** | Intensidad del malestar o sufrimiento | |  |  |
| **12** | Interferencia con el funcionamiento diario | |  |  |
| **13** | Control | |  |  |
| **14** | Ansiedad | |  |  |
| **15** | Interferencia con el pensamiento | |  |  |
| **16** | Voces en 1ª, 2ª o 3ª persona | 1ª |  |  |
| 2ª |  |  |
| 3ª |  |  |

**Duración del periodo en que se escuchan voces:** _______________ **meses / años**

**Alucinaciones en otras modalidades:** (mes) **visual / olfativa / gustativa / táctil**

(………) **visual / olfativa / gustativa / táctil**

**Encuesta sobre Voces Positivas y Útiles**

(Jenner, J.A., Beuckens, J., Rutten, S., 2006)

**Las voces positivas son voces que usted experimenta como agradables o placenteras.**

**Las voces útiles son voces que pueden experimentarse de forma tanto positiva como negativa, pero que para usted tienen una función claramente útil.**

1. La primera voz que oyó usted fue... *(Rellene tanto a. como b.)*

| a.  Positiva   Tanto positiva como negativa   Negativa | b.  Útil   Tanto útil como no útil   No útil |
| --- | --- |

1. Las voces que ha oído usted durante las últimas cuatro semanas han sido... *(Rellene tanto a. como b.)*

| a.  Positivas   Tanto positivas como negativas   Negativas   No aplicable | b.  Útiles   Tanto útiles como no útiles   No útiles   No aplicable |
| --- | --- |
|  |  |

1. ¿Ha cambiado la naturaleza de sus voces con el paso del tiempo?

- Sí, mis voces positivas se han vuelto negativas.
- Sí, mis voces negativas se han vuelto positivas.
- Sí, tanto mis voces positivas como mis voces negativas han cambiado de naturaleza.
- No, la naturaleza de mis voces se ha mantenido siempre igual.

1. ¿Ha cambiado la función de sus voces con el paso del tiempo?

- Sí, mis voces útiles han perdido su función de utilidad.
- Sí, mis voces no útiles se han vuelto útiles.
- No, no ha cambiado.

1. De haberse producido cambios, ¿de qué cree usted que depende el cambio en sus voces?

- De factores personales, como por ejemplo mi capacidad de autonomía, mi estado de ánimo o la imagen que tengo de mí mismo/a.
- De factores del entorno, como el estrés.
- Del tratamiento psiquiátrico que he recibido a causa de mis voces.
- De mis voces propiamente dichas.
- De otra cosa, concretamente… …………………………………………………………………………
- Mis voces no han cambiado de naturaleza o de función.

**1ª Parte: Voces positivas**

**Esta parte de la encuesta trata sobre las voces positivas. Estas preguntas se refieren a las voces positivas que ha oído usted durante el último mes, o –si ha dejado de oírlas– durante el último mes en que oyó voces positivas. Si nunca ha oído voces que le hayan parecido positivas, pase a la pregunta 23.**

1. Con el paso del tiempo, el número de voces positivas que oí…

- Aumentó
- Disminuyó
- Se mantuvo igual

1. ¿Con qué frecuencia media oyó usted voces positivas en el periodo de cuatro semanas en que oyó el mayor número de voces positivas?

- Continuamente
- Diariamente, … veces al día
- Semanalmente, … veces a la semana
- Mensualmente, … veces al mes

1. ¿Suenan las voces positivas como las de personas que usted conoce?

 Sí  No

 A veces sí y a veces no  No lo sé

1. ¿Se dirigen las voces positivas a usted, o hablan sobre usted?

 Las voces se dirigen a mí personalmente (por ej., me dicen “tienes que hacer esto”).

- Las voces hablan (individualmente o entre ellas) sobre mí (por ejemplo, “él/ella tiene que hacer esto”).
- Las voces se dirigen a mí personalmente y también hablan sobre mí.

1. ¿Han tenido las voces positivas y negativas alguna vez control unas sobre otras?

- Sí, mis voces negativas tienen control sobre mis voces positivas.
- Sí, mis voces positivas tienen control sobre mis voces negativas.
- Sí, mis voces positivas y negativas tienen control alterno unas sobre otras.
- No, mis voces no tienen control unas sobre otras.

1. ¿Le ayudan las voces positivas a sobrellevar sus voces negativas?

 Sí  No  No lo sé

| Totalmente en desacuerdo |  | Completamente de acuerdo |
| --- | --- | --- |

Mis voces positivas…

1. Las tengo bajo control 1 2 3 4 5
2. Me hacen feliz 1 2 3 4 5
3. Me proporcionan tranquilidad o alivio 1 2 3 4 5
4. Me hacen seguro/a de mí mismo/a 1 2 3 4 5
5. Me hacen importante 1 2 3 4 5
6. Me hacen compañía 1 2 3 4 5
7. Quieren protegerme 1 2 3 4 5
8. Me permiten hacer cosas agradables 1 2 3 4 5
9. Me divierten (por ejemplo, haciendo bromas) 1 2 3 4 5
10. Me apoyan 1 2 3 4 5
11. Quiero conservarlas 1 2 3 4 5

**2ª Parte: Voces útiles**

**Esta parte de la encuesta trata sobre las voces útiles. Estas preguntas se refieren a las voces útiles que ha oído usted durante el último mes, o –si ha dejado de oírlas– durante el último mes en que oyó voces útiles. Si nunca ha oído voces que le hayan parecido útiles, ha terminado usted la encuesta. Le agradecemos mucho su colaboración.**

1. Con el paso del tiempo, el número de voces útiles que oí…

- Aumentó
- Disminuyó
- Se mantuvo igual

1. Experimento mis voces útiles como…

- Negativas
- Tanto negativas como positivas
- Positivas

1. ¿Con qué frecuencia media oyó usted voces útiles en el periodo aproximado de cuatro semanas en que oyó el mayor número de voces útiles?

- Continuamente
- Diariamente, … veces al día
- Semanalmente, … veces a la semana
- Mensualmente, … veces al mes

1. ¿Se dirigen las voces útiles a usted, o hablan sobre usted?

 Las voces se dirigen a mí personalmente (por ejemplo, me dicen “tienes que hacer esto”).

- Las voces hablan (individualmente o entre ellas) sobre mí (por ejemplo, “él/ella tiene que hacer esto”).
- Las voces se dirigen a mí personalmente y también hablan sobre mí.

1. ¿Le ayudan las voces útiles a sobrellevar sus voces negativas?

 Sí  No  No lo sé

| Totalmente en desacuerdo |  | Completamente de acuerdo |
| --- | --- | --- |

Mis voces útiles…

1. Las tengo bajo control 1 2 3 4 5
2. Me ayudan a solucionar problemas 1 2 3 4 5
3. Me ayudan a cumplir con mis compromisos 1 2 3 4 5
4. Me ayudan en mis tareas cotidianas 1 2 3 4 5
5. Me ayudan a gestionar mis asuntos financieros 1 2 3 4 5
6. Me ayudan a cuidar mi apariencia física 1 2 3 4 5
7. Me ayudan a mantener contactos sociales 1 2 3 4 5
8. Me ayudan a desempeñar mi profesión 1 2 3 4 5
9. Me ayudan a realizar mis estudios 1 2 3 4 5
10. Me ayudan a desarrollar mis talentos 1 2 3 4 5
11. Me ayudan a mantener mi salud (física o mental)1 2 3 4 5
12. Quiero conservarlas 1 2 3 4 5
